# Supplementary material
Source: PubMed Central journal article supplement (PMC3675914)
Supplement: AEM.03983-12_zam999104453so1.pdf [file AEM.03983-12_zam999104453so1.pdf]

1 **Tables S-S7;Fig.S1**

2

3

4 **TABLE S1.** Summary of dietary treatment comparisons for unique OTUs, richness estimates, and diversity indices. The minimum  
 5 number of unique OTUs in each population was determined with a 10 % difference level.

|                        | Forage | Mixed forage | High grain | Acidotic challenge | Challenge recovery | SEM  | <i>P</i> -value |
|------------------------|--------|--------------|------------|--------------------|--------------------|------|-----------------|
| Number of sequences    | 5045   | 3731         | 4349       | 4148               | 4389               | 579  | 0.68            |
| Coverage (%)           | 99.0   | 98.8         | 99.1       | 98.9               | 99.0               | 0.2  | 0.64            |
| Total # of unique OTUs | 161    | 147          | 144        | 148                | 149                | 11   | 0.90            |
| Richness estimate      |        |              |            |                    |                    |      |                 |
| Chao1                  | 198    | 181          | 183        | 192                | 181                | 16   | 0.94            |
| ACE                    | 192    | 180          | 179        | 192                | 189                | 15   | 0.94            |
| Diversity indices      |        |              |            |                    |                    |      |                 |
| Shannon-Weiner         | 3.72   | 3.36         | 3.31       | 3.43               | 3.19               | 0.14 | 0.12            |
| Simpson's              | 0.95   | 0.92         | 0.91       | 0.93               | 0.89               | 0.02 | 0.16            |

6

7

8

9

10 **TABLE S2.** Percent contribution of genus level epithelial taxa to the rumen microbial populations averaged over all treatments for  
 11 individual animals. Treatments include forage, mixed forage, high grain, acidotic challenge and challenge recovery. Remaining genera  
 12 not shown due to non-significant differences between treatments.

| Genera                        | Individual animals |        |        |       |       |        |        |        | SEM | P-Value |
|-------------------------------|--------------------|--------|--------|-------|-------|--------|--------|--------|-----|---------|
|                               | 7                  | 41     | 43     | 143   | 153   | 156    | 315    | 346    |     |         |
| <i>12-18</i>                  | 0.0                | 0.0    | 0.0    | 0.0   | 1.6   | 2.5    | 8.1    | 1.2    | 0.7 | 0.07    |
| <i>adhufec405</i>             | 2.6                | 0.0    | 1.1    | 0.0   | 0.0   | 2.3    | 8.1    | 4.5    | 0.8 | 0.11    |
| <i>Atopobacter</i>            | 0.0                | 0.0    | 0.0    | 0.0   | 0.0   | 0.0    | 0.0    | 2.3    | 0.2 | 0.06    |
| <i>Carboxydibrachium</i>      | 0.0                | 1.1    | 0.0    | 2.6   | 6.3   | 0.0    | 0.0    | 1.4    | 0.6 | 0.11    |
| <i>Comamonas</i>              | 15.9a              | 5.6a   | 38.1b  | 40.8b | 29.8b | 34.2b  | 35.4b  | 29.4b  | 3.1 | 0.04    |
| <i>Dialister</i>              | 0.0                | 1.3    | 1.3    | 0.0   | 1.4   | 3.5    | 10.6   | 3.2    | 0.9 | 0.07    |
| <i>F24-B10</i>                | 0.0a               | 0.0a   | 0.0a   | 0.0a  | 0.0a  | 0.0a   | 5.4b   | 0.0a   | 0.3 | <0.001  |
| <i>Guggenheimella</i>         | 4.3ab              | 2.7a   | 6.8ab  | 10.9b | 5.7ab | 11.8b  | 2.8ab  | 9.4ab  | 0.8 | 0.03    |
| <i>IS Eub. cellulosolvans</i> | 5.3                | 2.1    | 0.0    | 0.0   | 1.3   | 0.0    | 0.0    | 1.4    | 0.5 | 0.09    |
| <i>Oxobacter</i>              | 11.4               | 5.7    | 11.3   | 5.2   | 1.4   | 2.8    | 0.0    | 9.6    | 1.2 | 0.06    |
| <i>p-4496-6Wb3</i>            | 2.5ab              | 0.0a   | 1.6ab  | 9.7b  | 2.2ab | 0.0a   | 5.7ab  | 2.5ab  | 0.7 | 0.02    |
| <i>Pelospora</i>              | 15.4ab             | 15.2ab | 15.8ab | 31.6b | 3.2a  | 21.2ab | 11.1ab | 10.4ab | 2.0 | 0.03    |
| <i>rc1-13</i>                 | 4.2                | 2.9    | 5.2    | 13.4  | 8.5   | 4.3    | 12.5   | 3.9    | 1.1 | 0.07    |
| <i>RC20</i>                   | 0.0a               | 0.0a   | 0.0a   | 0.0a  | 7.0b  | 0.0a   | 0.0a   | 1.4ab  | 0.6 | 0.01    |
| <i>Succinivibrio</i>          | 0.0                | 0.0    | 1.3    | 0.0   | 0.0   | 3.1    | 9.2    | 3.9    | 0.8 | 0.07    |
| <i>Thermotalea</i>            | 0.0a               | 4.9b   | 4.1b   | 4.0b  | 4.2b  | 0.0a   | 0.0a   | 0.0a   | 0.6 | 0.05    |
| <i>U29-B03</i>                | 0.0a               | 0.0a   | 0.0a   | 0.0a  | 0.0a  | 3.5b   | 0.0a   | 0.0a   | 0.2 | <0.001  |
| <i>uncultured</i>             | 9.4ab              | 8.6ab  | 13.3b  | 4.2a  | 16.5b | 4.3a   | 2.7a   | 10.9ab | 1.2 | 0.05    |

|                          |       |      |       |        |        |        |       |       |     |      |
|--------------------------|-------|------|-------|--------|--------|--------|-------|-------|-----|------|
| <i>Verminophrobacter</i> | 0.0a  | 0.0a | 0.0a  | 6.4b   | 1.9ab  | 0.0a   | 1.8ab | 4.2b  | 0.6 | 0.03 |
| <i>wet75</i>             | 9.1ab | 3.1a | 7.5ab | 11.4ab | 11.8ab | 19.01b | 2.5a  | 7.8ab | 1.2 | 0.05 |

---

13

14

15 **TABLE S3.** Correlation of all calculated pH variables from the acidotic challenge treatment to epithelial genera. Only those genera  
 16 found to be significant are shown. acidotic challenge pH variables are the mean for all animals on that dietary treatment.

| Genera                           |                 | pH variables |         |        |                             |                            |                             |                            |                             |                            |
|----------------------------------|-----------------|--------------|---------|--------|-----------------------------|----------------------------|-----------------------------|----------------------------|-----------------------------|----------------------------|
|                                  |                 | pH min       | pH mean | pH max | Duration under pH 5.8 (min) | pH area under 5.8 (pH×min) | Duration under pH 5.5 (min) | pH area under 5.5 (pH×min) | Duration under pH 5.2 (min) | pH area under 5.2 (pH×min) |
| <i>Acetitomaculum</i>            | Correlation     | -0.32        | -0.31   | 0.19   | 0.20                        | 0.45                       | 0.24                        | 0.52                       | 0.24                        | 0.57                       |
|                                  | <i>P</i> -Value | 0.09         | 0.10    | 0.32   | 0.29                        | 0.01                       | 0.20                        | 0.00                       | 0.22                        | 0.00                       |
| <i>Acidaminococcus</i>           | Correlation     | -0.32        | -0.33   | 0.16   | 0.27                        | 0.39                       | 0.26                        | 0.42                       | 0.24                        | 0.42                       |
|                                  | <i>P</i> -Value | 0.09         | 0.08    | 0.41   | 0.16                        | 0.04                       | 0.17                        | 0.03                       | 0.21                        | 0.02                       |
| <i>Anaerophaga</i>               | Correlation     | -0.38        | -0.61   | 0.12   | 0.25                        | 0.62                       | 0.32                        | 0.71                       | 0.41                        | 0.80                       |
|                                  | <i>P</i> -Value | 0.04         | 0.00    | 0.52   | 0.18                        | 0.00                       | 0.09                        | 0.00                       | 0.03                        | 0.00                       |
| <i>Anaerovorax</i>               | Correlation     | 0.34         | 0.44    | 0.12   | -0.43                       | -0.40                      | -0.45                       | -0.36                      | -0.38                       | -0.31                      |
|                                  | <i>P</i> -Value | 0.07         | 0.02    | 0.53   | 0.02                        | 0.03                       | 0.02                        | 0.05                       | 0.04                        | 0.11                       |
| <i>Atopobacter</i>               | Correlation     | -0.30        | -0.17   | 0.16   | 0.38                        | 0.30                       | 0.36                        | 0.25                       | 0.24                        | 0.14                       |
|                                  | <i>P</i> -Value | 0.11         | 0.39    | 0.41   | 0.04                        | 0.11                       | 0.06                        | 0.19                       | 0.20                        | 0.47                       |
| <i>Atopobium</i>                 | Correlation     | -0.61        | -0.58   | -0.37  | 0.76                        | 0.61                       | 0.73                        | 0.51                       | 0.60                        | 0.35                       |
|                                  | <i>P</i> -Value | 0.00         | 0.00    | 0.05   | 0.00                        | 0.00                       | 0.00                        | 0.00                       | 0.00                        | 0.06                       |
| <i>Azonexus</i>                  | Correlation     | 0.39         | 0.40    | -0.06  | -0.50                       | -0.39                      | -0.48                       | -0.32                      | -0.43                       | -0.25                      |
|                                  | <i>P</i> -Value | 0.04         | 0.03    | 0.75   | 0.01                        | 0.04                       | 0.01                        | 0.09                       | 0.02                        | 0.18                       |
| <i>Bacteroides</i>               | Correlation     | -0.11        | -0.34   | -0.07  | 0.07                        | 0.29                       | 0.13                        | 0.35                       | 0.20                        | 0.39                       |
|                                  | <i>P</i> -Value | 0.57         | 0.08    | 0.72   | 0.72                        | 0.13                       | 0.52                        | 0.06                       | 0.30                        | 0.03                       |
| <i>Butyrivibrio fibrisolvens</i> | Correlation     | 0.55         | 0.49    | 0.20   | -0.59                       | -0.52                      | -0.57                       | -0.46                      | -0.51                       | -0.38                      |
|                                  | <i>P</i> -Value | 0.00         | 0.01    | 0.31   | 0.00                        | 0.00                       | 0.00                        | 0.01                       | 0.00                        | 0.04                       |
| <i>Carboxydibrachium</i>         | Correlation     | 0.40         | 0.27    | 0.26   | -0.34                       | -0.27                      | -0.34                       | -0.23                      | -0.30                       | -0.16                      |
|                                  | <i>P</i> -Value | 0.03         | 0.15    | 0.18   | 0.07                        | 0.15                       | 0.07                        | 0.23                       | 0.11                        | 0.40                       |
| <i>cc142</i>                     | Correlation     | -0.43        | -0.26   | -0.17  | 0.43                        | 0.24                       | 0.38                        | 0.15                       | 0.31                        | 0.03                       |
|                                  | <i>P</i> -Value | 0.02         | 0.18    | 0.38   | 0.02                        | 0.21                       | 0.04                        | 0.43                       | 0.11                        | 0.87                       |
| <i>Comamonas</i>                 | Correlation     | 0.17         | 0.17    | -0.06  | -0.07                       | -0.30                      | -0.20                       | -0.36                      | -0.27                       | -0.39                      |
|                                  | <i>P</i> -Value | 0.38         | 0.37    | 0.78   | 0.71                        | 0.11                       | 0.29                        | 0.06                       | 0.16                        | 0.04                       |
| <i>Dialister</i>                 | Correlation     | -0.32        | -0.36   | 0.06   | 0.37                        | 0.34                       | 0.36                        | 0.31                       | 0.39                        | 0.28                       |
|                                  | <i>P</i> -Value | 0.09         | 0.06    | 0.74   | 0.05                        | 0.07                       | 0.05                        | 0.11                       | 0.03                        | 0.13                       |
| <i>Eub. brachy</i>               | Correlation     | 0.48         | 0.35    | 0.00   | -0.37                       | -0.26                      | -0.31                       | -0.22                      | -0.28                       | -0.17                      |

| Genera                          |                 | pH variables |         |        |                             |                            |                             |                            |                             |                            |
|---------------------------------|-----------------|--------------|---------|--------|-----------------------------|----------------------------|-----------------------------|----------------------------|-----------------------------|----------------------------|
|                                 |                 | pH min       | pH mean | pH max | Duration under pH 5.8 (min) | pH area under 5.8 (pH×min) | Duration under pH 5.5 (min) | pH area under 5.5 (pH×min) | Duration under pH 5.2 (min) | pH area under 5.2 (pH×min) |
|                                 | <i>P</i> -Value | 0.01         | 0.06    | 0.99   | 0.05                        | 0.17                       | 0.10                        | 0.26                       | 0.14                        | 0.37                       |
| <i>Fervidicola</i>              | Correlation     | 0.43         | 0.34    | -0.06  | -0.33                       | -0.28                      | -0.34                       | -0.24                      | -0.35                       | -0.18                      |
|                                 | <i>P</i> -Value | 0.02         | 0.07    | 0.75   | 0.08                        | 0.15                       | 0.08                        | 0.22                       | 0.06                        | 0.35                       |
| <i>Fusobacterium</i>            | Correlation     | 0.48         | 0.37    | 0.61   | -0.31                       | -0.25                      | -0.27                       | -0.22                      | -0.21                       | -0.18                      |
|                                 | <i>P</i> -Value | 0.01         | 0.05    | 0.00   | 0.10                        | 0.19                       | 0.16                        | 0.26                       | 0.28                        | 0.36                       |
| <i>Incertae Sedis C. viride</i> | Correlation     | 0.47         | 0.33    | -0.06  | -0.35                       | -0.24                      | -0.29                       | -0.20                      | -0.27                       | -0.16                      |
|                                 | <i>P</i> -Value | 0.01         | 0.08    | 0.76   | 0.06                        | 0.20                       | 0.12                        | 0.31                       | 0.15                        | 0.42                       |
| <i>IS B. fibrisolvens H15</i>   | Correlation     | -0.36        | -0.54   | 0.11   | 0.34                        | 0.56                       | 0.36                        | 0.61                       | 0.47                        | 0.66                       |
|                                 | <i>P</i> -Value | 0.05         | 0.00    | 0.55   | 0.07                        | 0.00                       | 0.05                        | 0.00                       | 0.01                        | 0.00                       |
| <i>IS cTPY-17 adhufec52</i>     | Correlation     | -0.49        | -0.45   | -0.04  | 0.33                        | 0.47                       | 0.40                        | 0.48                       | 0.55                        | 0.54                       |
|                                 | <i>P</i> -Value | 0.01         | 0.01    | 0.84   | 0.08                        | 0.01                       | 0.03                        | 0.01                       | 0.00                        | 0.00                       |
| <i>IS R. gnavus</i>             | Correlation     | -0.38        | -0.61   | 0.12   | 0.25                        | 0.62                       | 0.32                        | 0.71                       | 0.41                        | 0.80                       |
|                                 | <i>P</i> -Value | 0.04         | 0.00    | 0.52   | 0.18                        | 0.00                       | 0.09                        | 0.00                       | 0.03                        | 0.00                       |
| <i>Lactobacillus</i>            | Correlation     | -0.57        | -0.66   | 0.09   | 0.36                        | 0.74                       | 0.43                        | 0.84                       | 0.53                        | 0.93                       |
|                                 | <i>P</i> -Value | 0.00         | 0.00    | 0.64   | 0.05                        | 0.00                       | 0.02                        | 0.00                       | 0.00                        | 0.00                       |
| <i>Marvinbryantia</i>           | Correlation     | 0.45         | 0.42    | -0.15  | -0.45                       | -0.40                      | -0.45                       | -0.36                      | -0.41                       | -0.30                      |
|                                 | <i>P</i> -Value | 0.01         | 0.02    | 0.44   | 0.01                        | 0.03                       | 0.01                        | 0.06                       | 0.03                        | 0.12                       |
| <i>Megasphaera</i>              | Correlation     | -0.52        | -0.63   | 0.09   | 0.33                        | 0.72                       | 0.40                        | 0.82                       | 0.48                        | 0.90                       |
|                                 | <i>P</i> -Value | 0.00         | 0.00    | 0.64   | 0.08                        | 0.00                       | 0.03                        | 0.00                       | 0.01                        | 0.00                       |
| <i>Mitsuokella</i>              | Correlation     | -0.38        | -0.61   | 0.12   | 0.25                        | 0.62                       | 0.32                        | 0.71                       | 0.41                        | 0.80                       |
|                                 | <i>P</i> -Value | 0.04         | 0.00    | 0.52   | 0.18                        | 0.00                       | 0.09                        | 0.00                       | 0.03                        | 0.00                       |
| <i>Olsenella</i>                | Correlation     | -0.61        | -0.51   | -0.05  | 0.41                        | 0.58                       | 0.45                        | 0.61                       | 0.57                        | 0.67                       |
|                                 | <i>P</i> -Value | 0.00         | 0.00    | 0.79   | 0.03                        | 0.00                       | 0.01                        | 0.00                       | 0.00                        | 0.00                       |
| <i>rc1-13</i>                   | Correlation     | 0.49         | 0.50    | -0.09  | -0.50                       | -0.52                      | -0.54                       | -0.49                      | -0.51                       | -0.42                      |
|                                 | <i>P</i> -Value | 0.01         | 0.01    | 0.63   | 0.01                        | 0.00                       | 0.00                        | 0.01                       | 0.01                        | 0.02                       |
| <i>RC25</i>                     | Correlation     | 0.35         | 0.30    | -0.29  | -0.39                       | -0.32                      | -0.39                       | -0.26                      | -0.36                       | -0.21                      |
|                                 | <i>P</i> -Value | 0.06         | 0.11    | 0.13   | 0.03                        | 0.09                       | 0.04                        | 0.17                       | 0.05                        | 0.28                       |
| <i>RC39</i>                     | Correlation     | -0.75        | -0.71   | -0.08  | 0.64                        | 0.79                       | 0.69                        | 0.79                       | 0.70                        | 0.77                       |
|                                 | <i>P</i> -Value | 0.00         | 0.00    | 0.68   | 0.00                        | 0.00                       | 0.00                        | 0.00                       | 0.00                        | 0.00                       |
| <i>RF21</i>                     | Correlation     | 0.44         | 0.45    | -0.02  | -0.35                       | -0.35                      | -0.31                       | -0.34                      | -0.29                       | -0.34                      |
|                                 | <i>P</i> -Value | 0.02         | 0.01    | 0.91   | 0.07                        | 0.06                       | 0.10                        | 0.07                       | 0.13                        | 0.07                       |

| Genera                    |                 | pH variables |         |        |                             |                            |                             |                            |                             |                            |
|---------------------------|-----------------|--------------|---------|--------|-----------------------------|----------------------------|-----------------------------|----------------------------|-----------------------------|----------------------------|
|                           |                 | pH min       | pH mean | pH max | Duration under pH 5.8 (min) | pH area under 5.8 (pH×min) | Duration under pH 5.5 (min) | pH area under 5.5 (pH×min) | Duration under pH 5.2 (min) | pH area under 5.2 (pH×min) |
| <i>RF38</i>               | Correlation     | 0.52         | 0.38    | 0.08   | -0.43                       | -0.35                      | -0.41                       | -0.30                      | -0.35                       | -0.24                      |
|                           | <i>P</i> -Value | 0.00         | 0.04    | 0.67   | 0.02                        | 0.06                       | 0.03                        | 0.11                       | 0.06                        | 0.20                       |
| <i>RFN71</i>              | Correlation     | 0.30         | 0.35    | -0.36  | -0.36                       | -0.42                      | -0.44                       | -0.40                      | -0.50                       | -0.35                      |
|                           | <i>P</i> -Value | 0.12         | 0.06    | 0.06   | 0.05                        | 0.02                       | 0.02                        | 0.03                       | 0.01                        | 0.07                       |
| <i>RFN8-YE57</i>          | Correlation     | 0.42         | 0.42    | 0.06   | -0.41                       | -0.42                      | -0.42                       | -0.40                      | -0.38                       | -0.32                      |
|                           | <i>P</i> -Value | 0.02         | 0.02    | 0.77   | 0.03                        | 0.02                       | 0.02                        | 0.03                       | 0.04                        | 0.09                       |
| <i>Ruminococcus 1</i>     | Correlation     | 0.43         | 0.46    | 0.07   | -0.42                       | -0.40                      | -0.42                       | -0.37                      | -0.42                       | -0.32                      |
|                           | <i>P</i> -Value | 0.02         | 0.01    | 0.73   | 0.02                        | 0.03                       | 0.02                        | 0.05                       | 0.02                        | 0.09                       |
| <i>Saccharofermentans</i> | Correlation     | 0.61         | 0.52    | -0.04  | -0.59                       | -0.51                      | -0.58                       | -0.44                      | -0.50                       | -0.36                      |
|                           | <i>P</i> -Value | 0.00         | 0.00    | 0.86   | 0.00                        | 0.01                       | 0.00                        | 0.02                       | 0.01                        | 0.05                       |
| <i>Selenomonas</i>        | Correlation     | -0.38        | -0.61   | 0.12   | 0.25                        | 0.62                       | 0.32                        | 0.71                       | 0.41                        | 0.80                       |
|                           | <i>P</i> -Value | 0.04         | 0.00    | 0.52   | 0.18                        | 0.00                       | 0.09                        | 0.00                       | 0.03                        | 0.00                       |
| <i>Solobacterium</i>      | Correlation     | -0.63        | -0.59   | -0.01  | 0.55                        | 0.57                       | 0.60                        | 0.52                       | 0.62                        | 0.46                       |
|                           | <i>P</i> -Value | 0.00         | 0.00    | 0.97   | 0.00                        | 0.00                       | 0.00                        | 0.00                       | 0.00                        | 0.01                       |
| <i>Streptococcus</i>      | Correlation     | -0.43        | -0.63   | 0.12   | 0.28                        | 0.66                       | 0.35                        | 0.76                       | 0.44                        | 0.85                       |
|                           | <i>P</i> -Value | 0.02         | 0.00    | 0.55   | 0.14                        | 0.00                       | 0.06                        | 0.00                       | 0.02                        | 0.00                       |
| <i>Succiniclasticum</i>   | Correlation     | -0.43        | -0.42   | -0.29  | 0.60                        | 0.47                       | 0.57                        | 0.39                       | 0.42                        | 0.27                       |
|                           | <i>P</i> -Value | 0.02         | 0.02    | 0.12   | 0.00                        | 0.01                       | 0.00                        | 0.04                       | 0.02                        | 0.16                       |
| <i>Succinivibrio</i>      | Correlation     | -0.41        | -0.43   | -0.07  | 0.49                        | 0.39                       | 0.53                        | 0.32                       | 0.61                        | 0.23                       |
|                           | <i>P</i> -Value | 0.03         | 0.02    | 0.74   | 0.01                        | 0.04                       | 0.00                        | 0.10                       | 0.00                        | 0.23                       |
| <i>Thermodesulfobium</i>  | Correlation     | 0.58         | 0.49    | 0.44   | -0.51                       | -0.48                      | -0.52                       | -0.43                      | -0.49                       | -0.36                      |
|                           | <i>P</i> -Value | 0.00         | 0.01    | 0.02   | 0.00                        | 0.01                       | 0.00                        | 0.02                       | 0.01                        | 0.05                       |
| <i>uncultured</i>         | Correlation     | 0.56         | 0.60    | 0.04   | -0.48                       | -0.53                      | -0.49                       | -0.52                      | -0.52                       | -0.51                      |
|                           | <i>P</i> -Value | 0.00         | 0.00    | 0.83   | 0.01                        | 0.00                       | 0.01                        | 0.00                       | 0.00                        | 0.00                       |
| <i>vadinHA42</i>          | Correlation     | 0.40         | 0.37    | 0.08   | -0.28                       | -0.35                      | -0.32                       | -0.35                      | -0.34                       | -0.31                      |
|                           | <i>P</i> -Value | 0.03         | 0.05    | 0.69   | 0.14                        | 0.06                       | 0.10                        | 0.06                       | 0.08                        | 0.10                       |
| <i>wet75</i>              | Correlation     | 0.22         | 0.20    | -0.17  | -0.05                       | -0.32                      | -0.22                       | -0.38                      | -0.38                       | -0.41                      |
|                           | <i>P</i> -Value | 0.25         | 0.30    | 0.37   | 0.81                        | 0.09                       | 0.26                        | 0.04                       | 0.04                        | 0.03                       |

17

18

19 **TABLE S4.** Percent contribution of phyla level epithelial taxa to the rumen microbial populations averaged over all treatments for  
 20 individual animals. Treatments include forage, mixed forage, high grain, acidotic challenge and challenge recovery.

| Phyla                  | Treatment |              |            |                    |                    | SEM   | P-Value |
|------------------------|-----------|--------------|------------|--------------------|--------------------|-------|---------|
|                        | forage    | mixed forage | high grain | acidotic challenge | Challenge Recovery |       |         |
| <i>Actinobacteria</i>  | 2.05a     | 1.89a        | 3.39ab     | 4.93b              | 2.60a              | 0.51  | 0.0001  |
| <i>Bacteroidetes</i>   | 9.86      | 7.87         | 9.05       | 8.42               | 12.81              | 1.60  | 0.34    |
| <i>Candidatus TM7</i>  | 1.58c     | 1.30bc       | 0.26a      | 0.46ab             | 0.28a              | 0.12  | 0.0003  |
| <i>Chloroflexi</i>     | 0.00      | 0.00         | 0.00       | 0.09               | 0.00               | 0.00  | 0.49    |
| <i>Fibrobacteres</i>   | 0.44      | 0.11         | 0.16       | 0.16               | 0.07               | 0.03  | 0.63    |
| <i>Firmicutes</i>      | 66.88     | 73.65        | 74.67      | 74.56              | 72.03              | 12.12 | 0.11    |
| <i>Fusobacteria</i>    | 2.58b     | 0.11a        | 0.10a      | 0.00a              | 0.00a              | 0.07  | 0.01    |
| <i>Planctomycetes</i>  | 0.30      | 0.31         | 0.00       | 0.00               | 0.00               | 0.02  | 0.36    |
| <i>Proteobacteria*</i> | 13.36     | 12.28        | 9.99       | 9.91               | 9.83               | 1.82  | 0.17    |
| <i>Spirochaetes</i>    | 0.59      | 0.74         | 0.50       | 0.06               | 0.52               | 0.08  | 0.37    |
| <i>Synergistetes</i>   | 0.17ab    | 0.10ab       | 0.63b      | 0.08a              | 0.25ab             | 0.04  | 0.05    |
| <i>Tenericutes</i>     | 0.92b     | 0.38ab       | 0.11ab     | 0.00a              | 0.14ab             | 0.04  | 0.05    |

21 \*Significant animal effect noted for *Proteobacteria* ( $P=0.04$ )

22 Letters in each row indicate significant difference between treatments.

23

24 **TABLE S5.** Correlation of pH variables to epithelial phylum. Only those phyla found to be significant are shown

| Phyla                         |                 | pH parameters |         |        |                             |                            |                             |                            |                             |                            |
|-------------------------------|-----------------|---------------|---------|--------|-----------------------------|----------------------------|-----------------------------|----------------------------|-----------------------------|----------------------------|
|                               |                 | pH min        | pH mean | pH max | Duration under pH 5.8 (min) | pH area under 5.8 (pH×min) | Duration under pH 5.5 (min) | pH area under 5.5 (pH×min) | Duration under pH 5.2 (min) | pH area under 5.2 (pH×min) |
| <i>Actinobacteria</i>         | Correlation     | -0.75         | -0.60   | -0.29  | 0.70                        | 0.68                       | 0.72                        | 0.63                       | 0.68                        | 0.54                       |
|                               | <i>P</i> -value | <0.001        | 0.00    | 0.13   | <0.001                      | <0.001                     | <0.001                      | <0.001                     | <0.001                      | 0.00                       |
| <i>Candidata division TM7</i> | Correlation     | 0.53          | 0.57    | -0.09  | -0.54                       | -0.60                      | -0.60                       | -0.57                      | -0.56                       | -0.50                      |
|                               | <i>P</i> -value | 0.00          | 0.00    | 0.65   | 0.00                        | 0.00                       | 0.00                        | 0.00                       | 0.00                        | 0.01                       |
| <i>Fusobacteria</i>           | Correlation     | 0.34          | 0.38    | 0.59   | -0.25                       | -0.20                      | -0.17                       | -0.18                      | -0.15                       | -0.17                      |
|                               | <i>P</i> -value | 0.07          | 0.04    | 0.00   | 0.19                        | 0.30                       | 0.39                        | 0.34                       | 0.44                        | 0.38                       |
| <i>Planctomycetes</i>         | Correlation     | 0.47          | 0.33    | -0.06  | -0.35                       | -0.25                      | -0.30                       | -0.20                      | -0.27                       | -0.16                      |
|                               | <i>P</i> -value | 0.01          | 0.08    | 0.77   | 0.06                        | 0.20                       | 0.12                        | 0.30                       | 0.15                        | 0.41                       |
| <i>Tenericutes</i>            | Correlation     | 0.39          | 0.32    | -0.01  | -0.31                       | -0.30                      | -0.33                       | -0.28                      | -0.32                       | -0.23                      |
|                               | <i>P</i> -value | 0.03          | 0.09    | 0.96   | 0.11                        | 0.11                       | 0.08                        | 0.14                       | 0.09                        | 0.22                       |

25

26



27 **TABLE S6.** Rumen fermentation variables measured in heifers during dietary transition. Transition treatment diets included forage,  
 28 mixed forage, high grain, acidotic challenge and challenge recovery\*.

| Rumen Fermentation Variable       | Treatment |              |            |                    |                    | SEM  | P-value |
|-----------------------------------|-----------|--------------|------------|--------------------|--------------------|------|---------|
|                                   | Forage**  | Mixed forage | High grain | Acidotic challenge | Challenge recovery |      |         |
| Mean nadir                        |           | 5.78b        | 4.96a      | 4.61a              | 5.08a              | 0.12 | <0.001  |
| Mean daily pH                     |           | 6.36b        | 5.99b      | 5.47a              | 6.09b              | 0.12 | <0.001  |
| Mean maximum pH                   |           | 6.95b        | 6.62a      | 7.00b              | 6.56a              | 0.07 | <0.001  |
| Rumen pH $\leq$ 5.8               |           |              |            |                    |                    |      |         |
| Duration (min day <sup>-1</sup> ) |           | 115c         | 828ab      | 1023a              | 512b               | 103  | <0.001  |
| Area under (pH $\times$ min)      |           | 25c          | 448ab      | 833a               | 186bc              | 106  | <0.001  |
| Rumen pH $\leq$ 5.5               |           |              |            |                    |                    |      |         |
| Duration (min day <sup>-1</sup> ) |           | 25b          | 616a       | 879a               | 232b               | 88   | <0.001  |
| Area under (pH $\times$ min)      |           | 4b           | 229ab      | 550a               | 77b                | 85   | <0.001  |
| Rumen pH $\leq$ 5.2               |           |              |            |                    |                    |      |         |
| Duration (min day <sup>-1</sup> ) |           | 0c           | 414ab      | 715a               | 101bc              | 99   | <0.001  |
| Area under (pH $\times$ min)      |           | 0b           | 78ab       | 338a               | 29b                | 68   | <0.001  |
| Total VFA, mM                     | 76.8a     | 91.8ab       | 144.2c     | 128.1abc           | 129.5bc            | 5.8  | 0.002   |
| Acetate (A), mmol/100mol          | 67.8b     | 61.8b        | 46.6a      | 51.5a              | 50.6a              | 1.4  | <0.001  |
| Propionate (P), mmol/100mol       | 17.8a     | 19.7a        | 37.5b      | 32.3b              | 33.1b              | 1.5  | <0.001  |
| Butyrate, mmol/100mol             | 3.84b     | 3.27b        | 1.27a      | 1.69a              | 1.84a              | 0.17 | <0.001  |
| Lactic acid, mM ***               |           |              | 0.71a      | 2.96b              | 0.03a              | 0.41 | 0.02    |

29 \*Letters in each row indicate significant difference between treatments. The pH variables are a mean values for all animals within a  
 30 dietary treatment for the 24 h period starting at 08:00 h on the day of bacterial sample collection. The VFA and lactic acid  
 31 concentrations are mean values for all animals on a dietary treatment for samples taken 4 h post-challenge.

32 \*\* pH values were unavailable during the forage treatment

33 \*\*\* Lactic acid values were unavailable for forage and mixed forage treatment.

34 **TABLE S7.** Rumen fermentation parameters including pH, volatile fatty acids and lactic acid averaged in individual cattle over diet  
 35 transition. Transition treatment diets included forage, mixed forage, high grain, acidotic challenge and challenge recovery.\*

| Fermentation variables            | Individual Animal |       |        |       |        |        |       |        | SEM  | <i>P</i> -value |
|-----------------------------------|-------------------|-------|--------|-------|--------|--------|-------|--------|------|-----------------|
|                                   | 7                 | 41    | 43     | 143   | 153    | 156    | 315   | 346    |      |                 |
| Mean nadir                        | 4.79              | 5.23  | 4.90   | 5.21  | 5.46   | 5.08   | 5.09  | 5.08   | 0.10 | 0.26            |
| Mean daily pH                     | 5.84              | 5.88  | 5.65   | 6.14  | 6.25   | 5.98   | 5.96  | 6.13   | 0.08 | 0.31            |
| Rumen pH $\leq$ 5.8               |                   |       |        |       |        |        |       |        |      |                 |
| Duration (min day <sup>-1</sup> ) | 788               | 494   | 1002   | 427   | 480    | 651    | 535   | 581    | 78   | 0.06            |
| Area under (pH x min)             | 509               | 557   | 625    | 131   | 167    | 319    | 319   | 356    | 77   | 0.27            |
| Rumen pH $\leq$ 5.5               |                   |       |        |       |        |        |       |        |      |                 |
| Duration (min day <sup>-1</sup> ) | 554               | 455   | 787    | 195   | 272    | 408    | 391   | 446    | 75   | 0.05            |
| Area under (pH x min)             | 311               | 415   | 348    | 43    | 53     | 164    | 180   | 206    | 57   | 0.38            |
| Rumen pH $\leq$ 5.2               |                   |       |        |       |        |        |       |        |      |                 |
| Duration (min day <sup>-1</sup> ) | 342               | 372   | 577    | 57    | 65     | 274    | 454   | 320    | 69   | 0.09            |
| Area under (pH x min)             | 178               | 290   | 141    | 7     | 3      | 61     | 122   | 88     | 41   | 0.51            |
| Total VFA, mM                     | 127.2             | 119.8 | 121.2  | 136.2 | 107.6  | 136.5  | 137.1 | 107.9  | 5.8  | 0.43            |
| Acetate (A), mmol/100mol          | 50.4a             | 57.1b | 53.9ab | 50.8a | 53.9ab | 51.2ab | 50.9a | 53.3ab | 1.4  | 0.01            |
| Propionate (P), mmol/100mol       | 32.5              | 28.2  | 31.3   | 33.1  | 26.1   | 31.8   | 33.4  | 30.3   | 1.5  | 0.18            |
| A:P (acetate:propionate)          | 1.65              | 2.43  | 2.07   | 1.57  | 2.39   | 2.06   | 1.84  | 2.03   | 0.17 | 0.17            |
| Butyrate, mmol/100mol             | 10.92             | 9.54  | 10.82  | 11.11 | 13.49  | 11.43  | 10.54 | 10.83  | 0.47 | 0.78            |
| Lactic acid, mM                   | 1.00              | 3.02  | 0.36   | 0.22  | 0.61   | 0.16   | 0.25  | 2.57   | 0.41 | 0.27            |

36 \*Letters in each row indicate significant difference between treatments. The pH variables are a mean values for all animals by dietary  
 37 treatment for the 24 h period starting at 08:00 h on the day of bacterial sample collection. The VFA and lactic acid concentrations are  
 38 mean values for all animals on a dietary treatment for samples taken 4 h post-challenge.

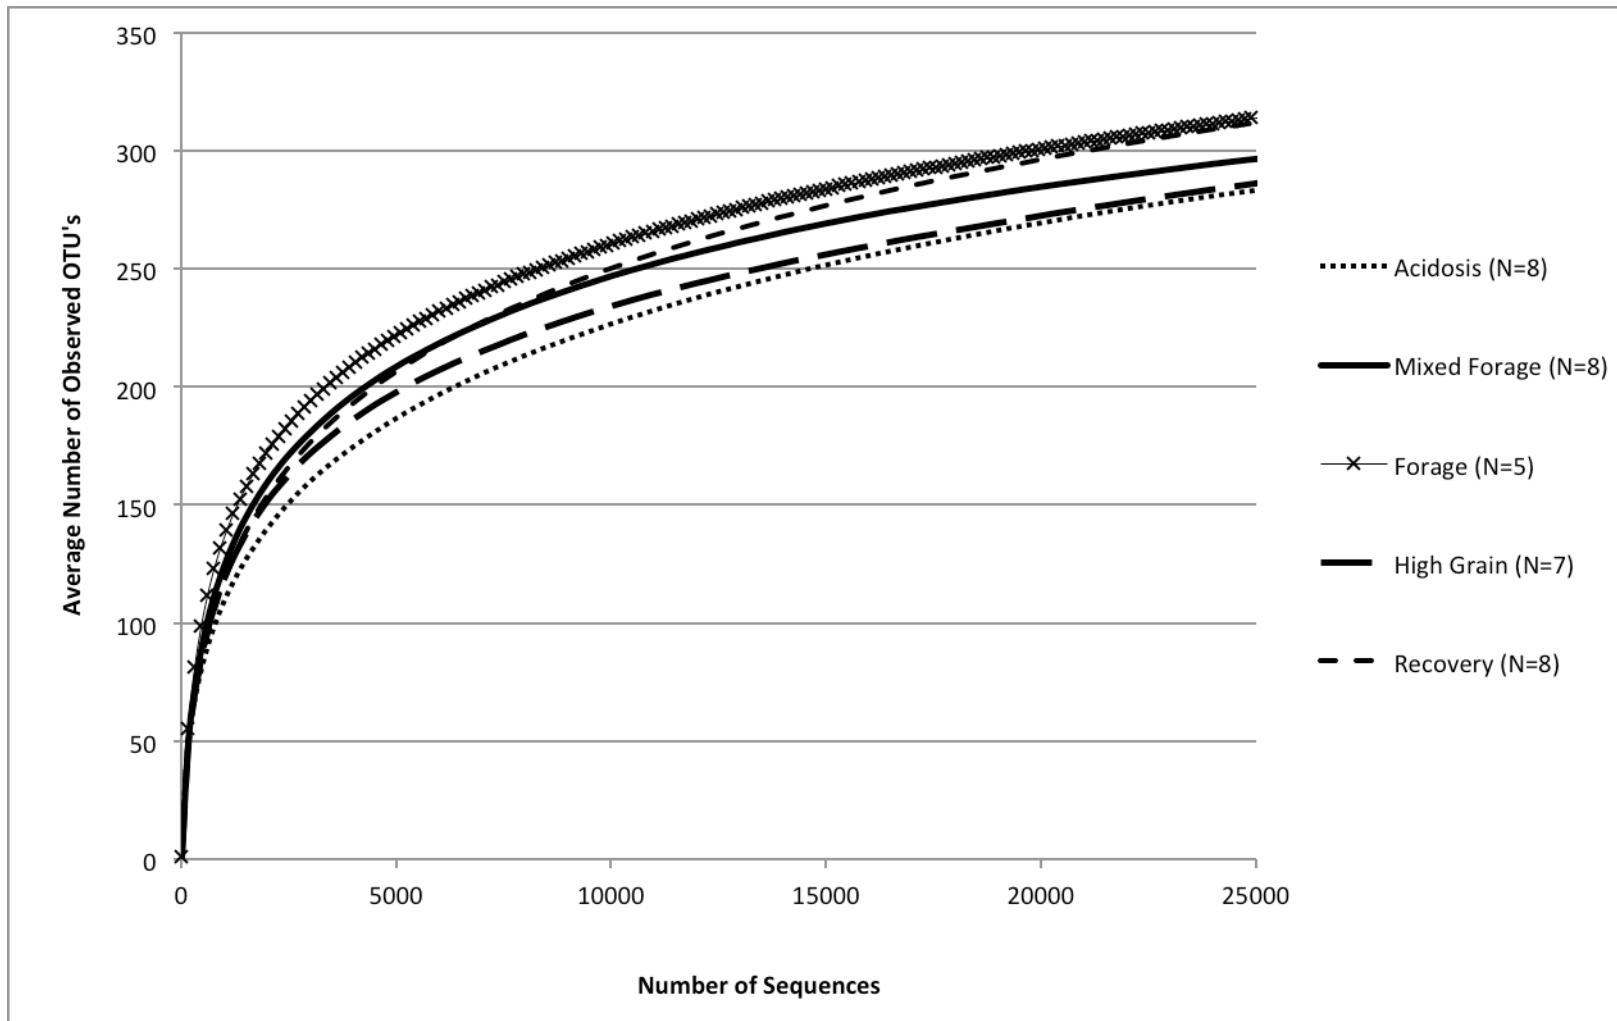

39

40 **Fig. S1.** Rarefaction curves for rumen epithelial bacterial communities for each animal treatment group. Each curve represents a  
 41 treatment average based on multiple animals. Unique OTU's are estimated at a 10% difference level.
